# Supplementary material
Source: PubMed Central journal article supplement (PMC3090244)
Supplement: supp_M014787_jlr.M014787-1.pdf [file supp_M014787_jlr.M014787-1.pdf]

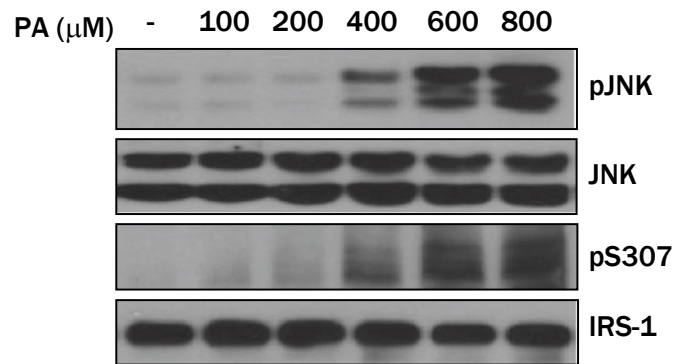

### Supplemental Fig. S1

**Fig. S1.** PA-induced JNK activation in a dose-dependent manner. L6 myotubes were treated with 100 ~ 800  $\mu\text{M}$  PA for 12 h, and phosphorylation of IRS-1 Ser307 and JNK was determined as in Fig. 1C.

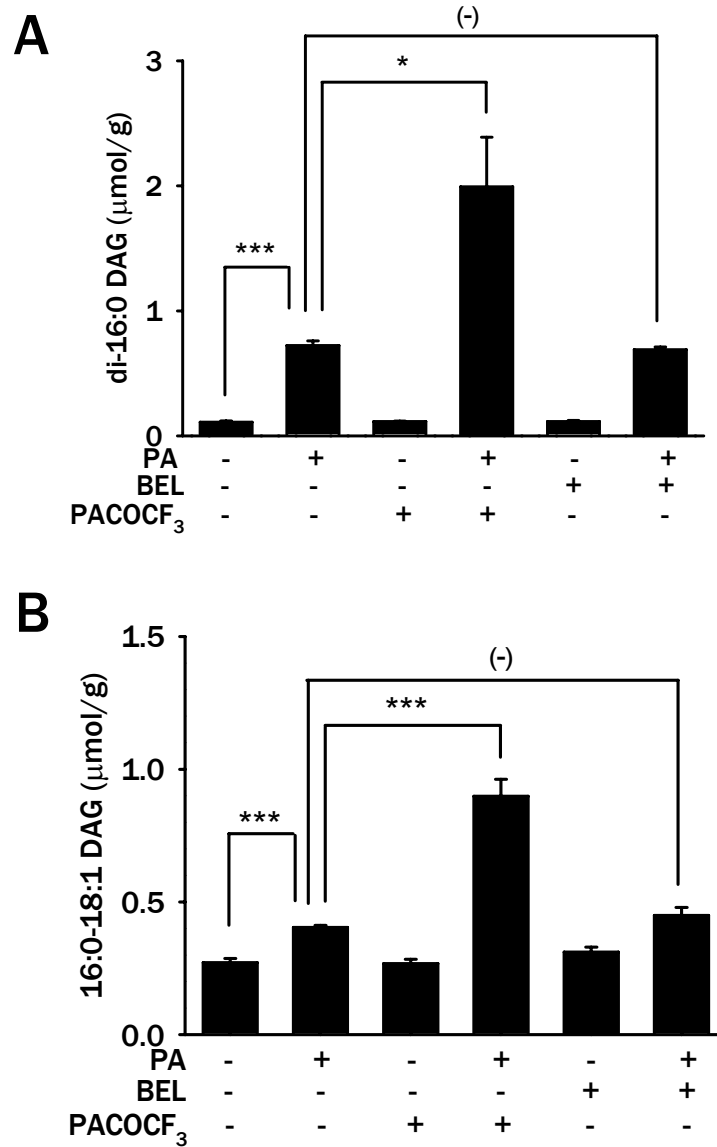

Supplemental Fig. S2

**Fig. S2.** Contents of specific DAG species after treatment with PA. L6 myotubes were treated with 600  $\mu\text{M}$  PA with or without pretreatment with 100  $\mu\text{M}$  PACOCF<sub>3</sub> or 10  $\mu\text{M}$  BEL as in Fig. 4D. Intracellular contents of di-16:0 (A) and 16:0-18:1 DAG (B) were measured as described in the Materials and Methods. (\*,  $P < 0.05$ ; \*\*\*,  $P < 0.005$ )

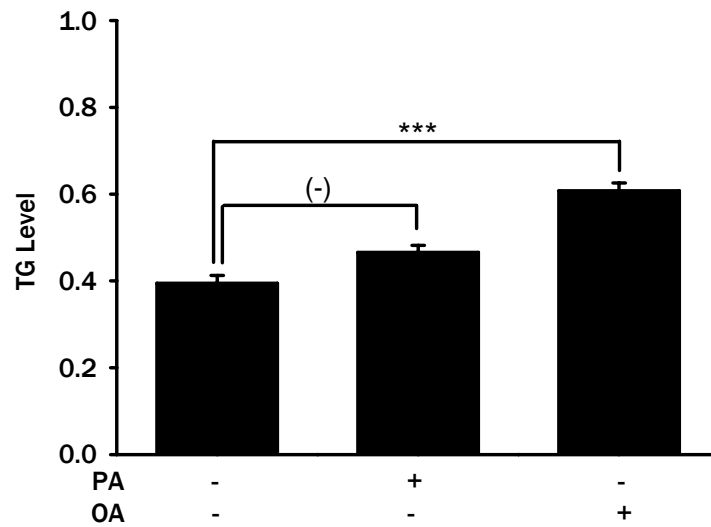

### Supplemental Fig. S3

**Fig. S3.** TG content after treatment with FFAs. L6 myotubes were treated with 600  $\mu$ M PA or 500  $\mu$ M OA for 48 h. TG content was measured as described in the Materials and Methods. (\*\*\*,  $P < 0.005$ )

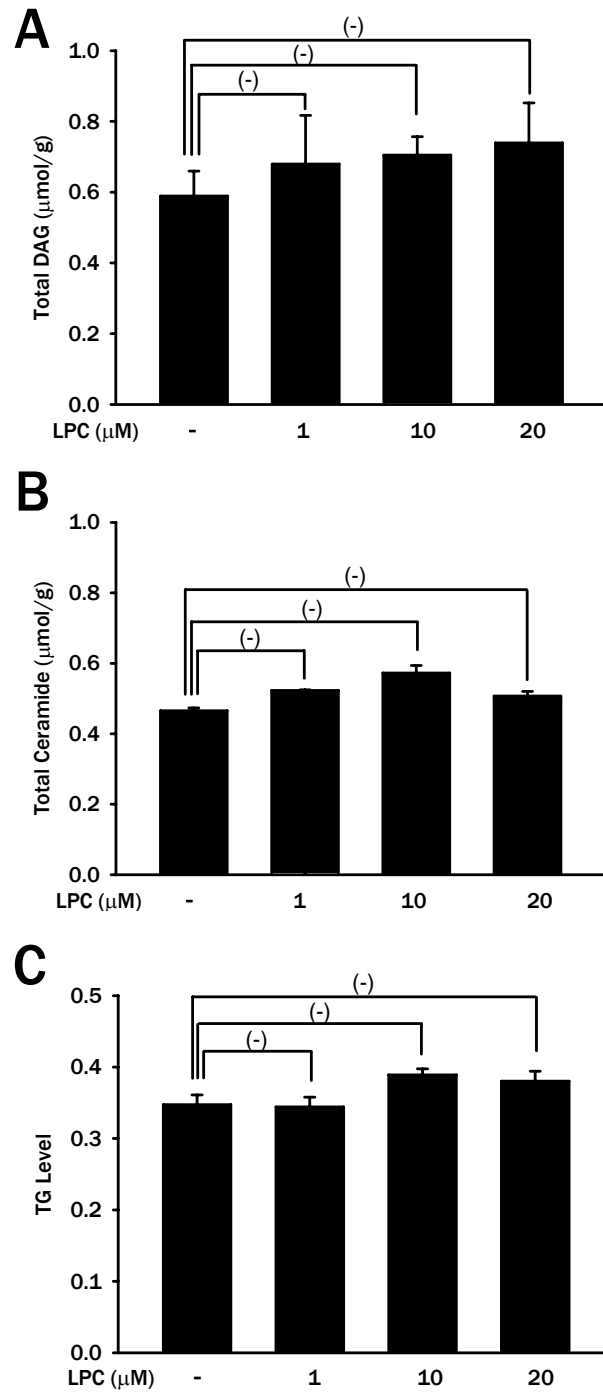

### Supplemental Fig. S4

**Fig. S4.** Contents of DAG, ceramide and TG after treatment with LPC. After treatment of L6 myotubes with LPC of the indicated concentrations for 3 h, intracellular contents of DAG (A), ceramide (B) and TG (C) were measured as described in the Materials and Methods.

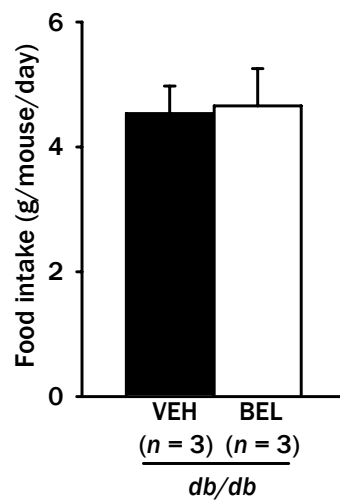

### Supplemental Fig. S5

**Fig. S5.** Effect of an iPLA<sub>2</sub>β inhibitor (BEL) on the food intake of *db/db* mice. Food intake was not significantly affected by BEL treatment.
